# Supplementary material for: Characteristics and influencing factors of rainfall-induced landslideand debris flow hazards in Shaanxi Province, China
Source: Copernicus journal article supplement (doi:10.5194/nhess-2018-262), 2018-09-12

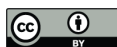

# Characteristics and influencing factors of rainfall-induced landslide and debris flow hazards in Shaanxi Province, China

Ke Zhang<sup>1\*</sup>, Sheng Wang<sup>1</sup>, Hongjun Bao<sup>2</sup>, Xiaomeng Zhao<sup>3</sup>

<sup>1</sup>State Key Laboratory of Hydrology-Water Resources and Hydraulic Engineering, and College of Hydrology and Water Resources, Hohai University, Nanjing, Jiangsu, 210098, China

<sup>2</sup>National Meteorological Center, China Meteorological Administration, Beijing, 100081, China

<sup>3</sup>Shaanxi Climate Center, Xi'an, Shaanxi, 710014, China

*Correspondence to:* Ke Zhang (kzhang@hhu.edu.cn)

**Abstract** Shaanxi Province, located in Northwest China and spanning multiple hydroclimatic and geological zones, has many areas largely suffering from rainfall-induced landslide and debris flow. The objectives of this study are to reveal the spatiotemporal characteristics of the two hazards and identify their major controlling factors in this region based on a region-wide, comprehensive ground survey-based hazard inventory dataset from 2009-2012. We investigated the spatiotemporal characteristics of the two hazards and quantified the relationships between the occurrence rates of the two hazards and their influencing factors, including antecedent rainfall amount, rainfall duration, rainfall intensity, terrain slope, land cover type and soil type. The results show that landslide has a higher occurrence rate and more extensive distribution than debris flow in this region, while the two hazards are both concentrated in the south with ample rainfall and steep terrains. Both of the hazards show clear seasonalities: July-September for landslide and July for debris flow. Rainfall characteristics (amount, duration and intensity) and slope are the dominant factors controlling slope stability across this region. Debris flow is more sensitive to these rainfall metrics on the high-value ranges than landslide in this region. Land cover is another influencing factor but soil type does not appear to impose consistent impacts on the occurrence of the two hazards. This study not only provides an important inventory data for studying the landslide and debris flow hazards but also add valuable information for modeling and predicting the two hazards to enhance resilience to these hazards in this region.

**Keywords** Rainfall-induced landslides; debris flows; spatiotemporal distribution; rainfall intensity; Shaanxi Province; slope stability

## 1. Introduction

Landslides and debris flows are two widespread and destructive natural hazards around the world (Peruccacci et al., 2012;Huang et al., 2017;Nicolussi et al., 2015;Blothe et al., 2015;Wooten et al., 2008;Hong et al., 2007), which can cause large casualties and economic losses (Jaboyedoff et al., 2012;Hong et al., 2017b;Zhang et al., 2016). Globally, landslides are responsible for approximately 1,000 deaths and about \$4 billion property losses per year (Pradhan and Youssef, 2010).

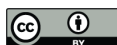

30 Landslide-caused fatalities accounted for 17% of fatalities due to natural hazards (Hong et al., 2015a). For debris flows, it is  
 31 more difficult to quantify the resultant casualties and damages because it is hard to distinguish debris flow-induced losses  
 32 with the losses caused by concurrent flood or the other hazards (Borga et al., 2014). China is one of the countries, which are  
 33 severely affected by geological disasters, including landslide and debris flow (Petley, 2010; Hong et al., 2015a). Statistical  
 34 report by Chinese Institution of Geological Environmental Monitoring showed that unexpected geological hazards led to  
 35 1,167 casualties and 6.4 billion CNY property losses per year (Zhang et al., 2017). Another research reported that landslide  
 36 disasters have caused about 1,100 fatalities and 5–10 billion US dollars in China since 2000 (Hong et al., 2017a).  
 37 Due to the massive casualties and property damages that the landslide and debris flow may cause, it is essential to have a  
 38 profound comprehension of the causes, e.g., heavy rainfall, earthquakes and human activities, of these disasters (Chen et al.,  
 39 2015b). The process of landslide occurrence is a complex non-linear process (Qin et al., 2001; Sorbino et al., 2010) that is  
 40 influenced by many different factors such as the geological features and hydrological conditions (Zhu et al., 2017). In many  
 41 regions, rainfall is the primary trigger (Milne et al., 2012) of shallow landslides and debris flows that have posed significant  
 42 threats to human lives and properties (Gariano et al., 2015; Pradhan and Youssef, 2010). Hence, numerous studies have been  
 43 conducted on understanding and modeling the rainfall-induced landslides and debris flows.  
 44 The methods used to predict landslide occurrence can be divided into two general categories, the statistical methods and the  
 45 physically based models. The representative statistical method is the rainfall threshold methods (Guzzetti et al.,  
 46 2007; Peruccacci et al., 2012; Gariano et al., 2015; Bogaard and Greco, 2018), which usually builds a simple statistical model  
 47 quantifying the relationship of landslide occurrence rate or probability with cumulated rainfall (the total rainfall measured  
 48 from the beginning of the rainfall event to the time of slope failure), rainfall intensity (the average rainfall intensity during  
 49 the rainfall event), and/or rainfall duration. The physically based models usually use the rainfall time series as the input data  
 50 to model the slope stability based on the physical processes and mechanisms. There are many physically based landslide  
 51 forecasting models such as TRIGRS (Baum et al., 2010; Alvioli and Baum, 2016), SHALSTAB (Montgomery and Dietrich,  
 52 1994), SLIDE (Hong et al., 2015b; Liao et al., 2012), and SLIP (Montrasio and Valentino, 2008). Recently, several studies  
 53 were conducted to couple the landslide models with distributed hydrological models to develop the coupled flood-landslide  
 54 models (He et al., 2016; Zhang et al., 2016). Modeling the movement and run-out extent of debris flow is a more complicated  
 55 process than modeling the slope failure or the landslide occurrence. Numerical simulation of the debris-flow process is  
 56 usually based on the shallow water equations (Han et al., 2017) and the numerical solutions of the mass and momentum  
 57 conservation equations using finite element and finite differential methods (Naef et al., 2006; Zhang et al., 2015).  
 58 Despite various advanced methods and models have been used for the prediction of landslide and debris flow, it is still  
 59 difficult to completely explain the physical mechanisms controlling slope failure and to accurately predict the occurrence of  
 60 landslide and debris flow in most areas (Hong et al., 2017a; Althuwaynee et al., 2014). Besides, there are limited efforts on

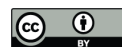

61 landslide and debris flow prediction in Shaanxi Province, China so far. Additional, most of the previous studies were mainly  
62 focused in understanding and modeling landslides and/or debris flows in small and medium-sized areas (Chen et al.,  
63 2017; Sun et al., 2016; Chen et al., 2016; Zhuang and Peng, 2014). There is still limited knowledge on the characteristics,  
64 distributions, and influencing factors of the landslide and debris flow hazards across this region.

65 Therefore, the objectives of this study are to reveal the spatiotemporal characteristics of rainfall-triggered landslide and  
66 debris flow hazards in Shaanxi Province and to identify the major controlling factors of the occurrence of the two hazards.

67 To this end, we firstly compiled an inventory data of rainfall-induced landslides and debris flows events in Shaanxi Province  
68 for the period 2009-2012 provided by the geological survey office of Department of Land and Resources of Shaanxi  
69 Province. Considering the interannual and intraannual differences in rainfall, we then analyzed the characteristics of  
70 spatiotemporal distributions of landslide and debris flow using statistical methods. Next, we derived the characteristics of  
71 rainfall processes, terrain slope, land cover type and soil type for each grid cell. Finally, we studied the relationships of  
72 landslide and debris flow occurrence rates with rainfall level, terrain slope, land cover type and soil type.

## 73 **2. Study area and data**

### 74 **2.1 Description of study area**

75 Shaanxi Province, situated in the inland of Northwest China, is located between 105°29' E-111°15' E longitude and 31°42'  
76 N-39°35' N latitude with a total area of about 205,800 km<sup>2</sup>. Statistical data show that more than 38 million people live in  
77 Shaanxi. Altitude mostly ranges from 350 to 3500 m with a regional average slope of 19.9° (Fig. 1a). In Shaanxi, elevation is  
78 higher in the north and south and lower in the middle (Fig. 1a). The average elevation of Qinling Mountains is more than  
79 2000 m and it stretches from east to west, representing an important natural line of demarcation between North and South  
80 China (Wu and Qian, 2017). The high elevations and relatively steep terrains in many areas of this region make them  
81 susceptible to both landslide and debris flow. The Bei Mountains and Qinling Mountains divide Shaanxi Province into three  
82 geographical regions: Shaanbei Loess Plateau in the north, Guanzhong Plain (also known as Wei River Basin) in the central  
83 area and Qinling-Dabashan Mountains in the south (Jiang et al., 2015). Because of this, land cover shows a distinct regional  
84 distribution from north to south: grasslands, cultivated lands and forests (Fig. 1b). The soil type in the study area is mainly  
85 loam (Fig. 1c).

86 The hydrological conditions of Shaanxi Province are diverse due to the diversity of its physiographic features and climate,  
87 which vary regionally and seasonally. The study area consists of three main climatic zones, semi-arid zone, semi-humid zone  
88 and humid zone, distributed from north to south. Regional mean annual temperature is about 6.5-16.6 °C. However,  
89 temperature decreases from south to north. Spatial average annual rainfall is 400-600 mm, 500-700 mm and 700-900 mm  
90 in northern, central and southern areas, respectively, while precipitation decreases from south to north and is significantly

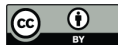

91 influenced by the mountains. In addition, rainfall has a strong seasonality in this region. Rainfall in summer is the greatest  
 92 and accounts for 40%-60% of annual rainfall. Rainfall of the remaining seasons decreases in the order of autumn, spring and  
 93 winter. As rainfall is mostly concentrated in the monsoon season (May-October), rainfall-triggered landslide and debris flow  
 94 occur frequently during this season.

## 95 2.2 Datasets

96 Data used in this study include rainfall, inventory data of geological hazards, digital elevation model (DEM), land cover, and  
 97 soil texture data. The rainfall, DEM, land cover and soil texture data are gridded data, while the inventory data of landslide  
 98 and debris flow hazards is a list of events with recorded locations (latitudes and longitudes), hazard types, causes, occurrence  
 99 times, and associated casualties.

100 The rainfall data are hourly observations from 756 stations provided by China Meteorological Administration (CMA). We  
 101 interpolated the site data into gridded data by using the inverse distance weighting method. The spatial resolution of grid is  
 102 90m. The geological disaster data are from geological survey office of Department of Land and Resources of Shaanxi  
 103 Province. The DEM data with a spatial resolution of 90m×90m were downloaded from the Geospatial Data Cloud  
 104 (<http://www.gscloud.cn>). This database covers land area from 60° N to 60° S and was released to the public in 2003.

105 The GlobeLand30-2010 Product is a product of global land cover at a spatial resolution of 30 m derived from remote sensing  
 106 images in 2010 (Chen et al., 2015a). The dataset covers land area from 80° N to 80° S and consists of 10 land cover types.  
 107 These 30 m data were aggregated to the 90-m resolution to match with the DEM data.

108 The soil data is from the Harmonized World Soil Database (HWSD) v1.2 (<https://daac.ornl.gov/SOILS/guides/HWSD.html>),  
 109 which were compiled from four source databases, the European Soil Database (ESDB), the 1:1,000,000 soil map of China,  
 110 various regional SOTER databases (SOTWIS Database), and the Soil Map of the World. The soil database used in the  
 111 research is classified based on the USDA classification method of soil texture, which includes 13 types. The soil data were  
 112 also reprojected and resampled to the 90-m resolution.

## 113 3. Methodology

114 To reveal the spatiotemporal distributions of the rainfall-triggered landslide and debris flow hazards, we analyzed the spatial,  
 115 latitudinal, interannual, and seasonal distributions of these hazard events and the relationship of the number of hazard events  
 116 with the corresponding rainfall amount.

117 To investigate the impacts of rainfall characteristics, including antecedent rainfall amount ( $P_a$ ), rainfall duration ( $D$ ) and  
 118 rainfall intensity ( $I$ ), terrain slope ( $\theta$ ), land cover type ( $L$ ) and soil type ( $S$ ) on the occurrence rates ( $R$ ) of the landslide and  
 119 debris flow, we first projected the locations of these recorded hazard events to the DEM grid with a spatial resolution of 90  
 120 m. If multiple events of the same type of hazard occurred on the same grid cell within one hour, these events are treated as

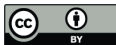

one event; the earliest occurrence time of these events is treated as the occurrence time of the combined event. From the 90 m DEM, we further computed the slope angles for each grid cell. We then tabulated all of the above gridded data with the following attributes: grid cell ID, rainfall event ID, rainfall amount, rainfall duration, rainfall intensity, rain intensity class, slope, land cover type, soil type and hazard type. We defined a rainfall event as an event with continuous rainfall or a combination of several discontinued rains with the non-rain intermittent periods less than or equal to two hours.

When we calculated the occurrence rate of one type of hazard, we excluded all grid cells without any reported event of this type of hazard and all rainless events from the analysis. The occurrence rate of a  $k$ th type hazard conditional on a given explanatory variable or its class  $J$  ( $R_{j,k}$ ) is define as:

$$R_{j,k} = \frac{n(J=j \text{ and } K=k)}{n[J=j \text{ and } (K=k \text{ or } K=0)]} \quad (1)$$

where  $K$  is the hazard type (0, 1 and 2 for rainfall event without causing any geological hazard, rainfall-induced landslide, rainfall-induce debris flow, respectively);  $J$  is the class of  $P_a$ ,  $D$ ,  $I$ ,  $\theta$ , land cover type and soil type;  $n(J = j \text{ and } K = k)$  is the number of events of a given hazard  $k$  when the corresponding  $J$  belongs to the  $j$ th class;  $n[J = i \text{ and } (K = k \text{ or } K = 0)]$  is the number of positive and negative events of a given hazard  $k$  when the corresponding  $J$  belongs to the  $j$ th class. In this study, we classified the rainfall amount, rainfall duration, rainfall intensity, and rain type into five (0-10, 10-30, 30-60, 60-100, and >100 mm), five (0-3, 3-12, 12-24, 24-36, and >36 hours), five (0-1, 1-2, 2-3, 3-5, >5 mm hour<sup>-1</sup>), and four classes (light rain, moderate rain, heavy rain, and violent rain), respectively. Following American Meteorology Society (Huschke, 2000), the light rain, moderate rain, heavy rain, and violent rain are defined as rains when the precipitation rate is < 2.5 mm hour<sup>-1</sup>, 2.5-7.6 mm hour<sup>-1</sup>, 7.6-50 mm hour<sup>-1</sup>, and >50 mm hour<sup>-1</sup>, respectively. We categorized the slope, land cover type and soil type into five (0-2°, 2-5°, 5-10°, 10-20°, and >20°), three (cultivated land, forest, and grassland), and three classes (loamy sand, loam, and clay), respectively. The other land cover types and soil types are not used in the computation of the hazard occurrence rates because we did not find any reported landslide or debris flow event under these types.

## 4. Results

### 4.1 Spatiotemporal distributions of landslide and debris flow events

The locations of the recorded landslide and debris flow events and the resultant casualties from 2009 to 2012 are shown in Fig. 2. It clear that all of these recorded landslide and debris flow events are located in the south of 36° N (Fig. 2). Relatively, debris flow events are distributed further south than landslides. Most of the landslide and debris flow events are near the rivers and/or in the areas with steep slopes (see Fig. 2 and Fig. 1a). In addition, the landslide events outnumber the debris flow events (Fig. 2), indicating that landslide occurs more frequently than debris flow in this region.



150 There are a total of 1177 reported rainfall-triggered landslide events in Shaanxi Province from 2009 to 2012 with respective  
 151 69, 619, 332 and 157 events in the four years (Fig. 3a), while a total of 209 rainfall-triggered debris flow events occurred in  
 152 this province during the same period, with respective 6, 175, 13 and 15 events in the four years (Fig. 3a). More than half of  
 153 the two types of events occurred in 2010. The corresponding casualties are clearly proportional to the number of hazards  
 154 (Fig. 3a). In particular, landslides and debris flows in 2010 killed 72 and 73 peoples, respectively. During the four-years  
 155 period, the reported landslide and debris flow hazards caused the deaths of 131 and 78 people, respectively (Fig. 3a),  
 156 indicating that the two types of hazards are destructive in this region. Relatively, debris flow is even more destructive than  
 157 landslide. Although the number of debris flow events account for only 15 % of the total events of the two hazards, the debris  
 158 flow-caused fatalities are 37.32 % of the total deaths caused by the two hazards (Fig. 3b). The above results suggest that

159 debris flow imposes a higher threat to people in this province per event than landslide.

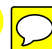

160 In terms of interannual distributions of the two hazards, annual total numbers of landslide and debris flow hazards show a  
 161 correlation with annual rainfall amount (Fig. 4a). However, annual rainfall amount is not the only factor influencing the  
 162 occurrences of the two hazards. For example, there is more annual rainfall in 2011 and 2012 than in 2010, but the total  
 163 numbers of landslide and debris flow events in 2011 and 2012 are actually lower than these in 2010 (Fig. 4a). In terms of  
 164 intra-annual distributions of the two hazards, landslide events are mainly distributed between July and September, which are  
 165 the top three months in terms of both total rainfall amount (Fig. 4b) and average rainfall intensity (Fig. 4c). In contrast,

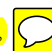

166 almost all of debris flow events occurred in July, the month having the largest rainfall amount (Fig. 4b) and rainfall intensity  
 167 (Fig. 4c) with multi-year mean values of 117 mm month<sup>-1</sup> and 0.96 mm hour<sup>-1</sup>, respectively during a year. Statistical analysis  
 168 shows that rainfall between July and September accounts for 63.6 % of annual rainfall, while the proportions of landslide  
 169 and debris flow events during the three months are 98.6 % and 100 % of annual events, respectively. Obviously, the  
 170 landslide and debris flow hazards are seasonal hazards in Shaanxi Province and mainly occur during the rainy season. The  
 171 above results show that the landslide season is longer than the debris flow season.

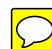

172 We further analyzed the latitudinal distribution of annual rainfall, the number of landslides, the number of debris flows, the  
 173 zonal average slope, and the percentages of dominant land cover by dividing the region into four latitude bins (31° N-33° N,  
 174 33° N-34° N, 34° N-35° N and 35° N-36° N). As there are no reported landslide and debris flow events in the areas north to  
 175 36° N, we excluded these regions for analyzing the distributions of these hazards and their relations to rainfall, terrain slope,  
 176 and land cover in these areas. There are apparent latitudinal gradients in annual rainfall and the numbers of report landslide  
 177 and debris flow events, which all decrease from the south to the north (Fig. 5). The regional average terrain slope generally  
 178 decreases from the south to the north with the respective values of 23.4°, 23.7°, 10.7° and 11.4° in the four latitude bins (Fig.

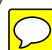

179 5). These results suggest that more rainfall and steeper slopes in the south can explain the larger numbers of reported  
 180 landslides and debris flows in the south than in the north. In addition, the southern part of this province (31° N-34° N) is



181 mainly covered by forests ( $\geq 78\%$ ), while the regions between  $34^\circ\text{ N}$ - $35^\circ\text{ N}$  and between  $35^\circ\text{ N}$ - $36^\circ\text{ N}$  are dominated by  
 182 cultivated lands ( $50\%$ ) and grasslands ( $47.1\%$ ), respectively (Fig. 5 and Fig. 1a). Although the southern region has a denser  
 183 and better preserved land cover than the middle and northern parts, the southern region still experiences more landslide and  
 184 debris flow hazards. This suggests that the meteorological and geomorphological factors such as rainfall and terrain slope  
 185 play more important roles in controlling the landslide and debris flow occurrence than land cover.

#### 186 4.2 Impacts of rainfall amount, intensity, and duration on the landslide and debris flow occurrence

187 To attribute the causes of the landslide and debris flow hazards, we further analyzed the relationships between rainfall  
 188 characteristics (antecedent accumulated amount, duration and intensity) and the occurrence rates of the two hazards. There  
 189 are no apparent relationships between the antecedent rainfall amount and the number of the landslide events and between the  
 190 antecedent rainfall amount and the number of the debris flow events (Fig. 6a). However, the occurrence rate of debris flow  
 191 exponentially increases with increasing antecedent rainfall amount ( $R = 0.0022\exp(1.8127P_a)$ ;  $R^2=0.988$ ) (Fig. 6a).  
 192 Similar relationship appears between the landslide occurrence rate and antecedent rainfall amount  
 193 ( $R = 0.0034\exp(1.6681P_a)$ ;  $R^2=0.977$ ). However, the landslide occurrence rate is higher than the debris flow occurrence  
 194 rate when antecedent accumulated rainfall is lower than  $100\text{ mm}$  (Fig. 6a). Once antecedent accumulated rainfall is above  
 195  $100\text{ mm}$ , the debris flow occurrence rate becomes much larger than the landslide occurrence rate (Fig. 6a). This suggests that  
 196 triggering debris flow generally requires more rainfall than triggering landslide.

197 The occurrence rates of the two hazards also show positive exponential relationships with the rainfall duration ( $R =$   
 198  $0.0002\exp(1.7175D)$ ,  $R^2=0.997$  for landslide;  $R = 0.00009\exp(1.9526D)$ ,  $R^2=0.977$  for debris flow) (Fig. 6b). In  
 199 addition, the occurrence rates of the two hazards also show positive exponential relationships with the average rainfall  
 200 intensity (Fig. 6c). These results indicate that rainfall amount, duration, and intensity all play an important role in controlling  
 201 the landslide and debris flow occurrence in this region. In addition, the three rainfall metrics usually correlate with each  
 202 other to some extent. In other words, the rainfall event that has the largest accumulated rainfall usually has a long duration  
 203 and high average rainfall intensity.

204 In terms of the rainfall intensity, rainfall events can be classified to four classes, i.e., light rain, moderate rain, heavy rain,  
 205 and violent rain according to American Meteorology Society. Therefore, we also calculated the regional average occurrence  
 206 rates of landslide and debris flow under the four rain classes. Similar to the relationships between the occurrence rates and  
 207 rainfall intensity (Fig. 6c), the regional average occurrence rates of the two hazards increase largely with increasing rainfall  
 208 class (Fig. 7). Furthermore, Fig. 8 shows the spatial maps of landslide and debris occurrence rates under different rain  
 209 classes. As rain becomes severe, both landslide and debris flow occur on more grid cells (Fig. 8a-d and Fig. 8e-h). For  
 210 example, light rains have caused 163 landslide events and 26 debris flow events during the four-years period with average  
 211 occurrence rates of  $0.006\%$  and  $0.005\%$ , respectively. In contrast, violent rains have led to 273 landslide events and 60

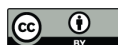

debris flow events during the same period with average occurrence rates of 2.70 % and 8.57 %, respectively. Meanwhile, the landslide occurrence rates on the grid cells that experience at least one landslide event during the four-years period increase with increased rainfall intensity as well (Fig. 8a-d). As shown in Fig. 8e-h, the debris flow occurrence rates on the grid cells that experience at least one debris flow event during the four-years period show a similar correlation with the rain classes (or rainfall intensity classes).

### 4.3 Relationship of the landslide and debris flow occurrence with slope, land cover type, and soil type

Terrain, in particular terrain slope, is another important factor determining slope stability. Therefore, we grouped the 90-m grid cells with at least one reported landslide or debris flow event during the study period into five slope bins, i.e., 0-2°, 2-5°, 5-10°, 10-20°, and >20°, and computed the respective landslide and debris flow occurrence rates. It is obvious that there are strong positive correlations between the occurrence rates of the two hazards and the slope angle (Fig. 9). Once again, the landslide occurrence rate is clearly larger than the debris flow occurrence rate under all of the five slope classes (Fig. 9). Relative to debris flow, landslide occurrence is more sensitive to terrain slope (Fig. 9). **With increasing terrain slope, the landslide occurrence rate accelerates much faster than the debris flow occurrence rate.**

We further analyzed the relationships of the hazard occurrence rates with land cover type and soil type. For debris flow, its occurrence rate is higher on the cultivated lands, followed by forests and grasslands (Fig. 10a). As shown in Fig. 1b, grasslands are mainly located in the north that has lower rainfall and much flatter terrain than in the south. **Therefore, it is not surprise to observe a lower debris flow occurrence rate on grasslands than on cultivated lands and forests.** For landslide, its occurrence rate is also the highest on cultivated lands, but the occurrence rates on forests and grasslands are very similar (Fig. 10a). Higher occurrence rates for both landslide and debris flow on cultivated lands than on forests and grassland suggest that the destruction and conversion of natural dense land cover can weaken slope stability, making these areas more susceptible to landslides.

In this region, our analysis based on the available data does not show that soil type imposes apparent, consistent effects on the occurrence rates of landslide and debris flow. For example, landslide has the highest occurrence rate in the clay soil among the tree dominant soil types in this region, while the landslide occurrence rates in the loam soil and the loamy sand soil are comparable (Fig. 10b). In contrast, debris flow has the highest occurrence rate in the loamy sand soil, while the debris flow occurrence rates are similar in the loam and clay soils (Fig. 10b).

## 5. Discussions

Based on the survey of rainfall-induced landslide and debris flow hazards from 2009 to 2012 in Shaanxi Province, China, our results show that both of landslide and debris flow occur frequently in this region and are mainly distributed in the southern part of this province, which have more rainfall and steeper terrain slopes than the other areas of this province.





242 Landslide happens more frequently than debris flow. Although the number of the reported debris flow events is only one  
 243 sixth of the number of the recorded landslide events in this region, the debris flow-caused casualties is equal to 60 % of the  
 244 landslide-caused casualties. Clearly, debris flow is more destructive than landslide in this region in terms of the casualty per  
 245 event. Like many areas in the world, debris flow usually occurs in the areas near the stream network, which usually has  
 246 higher population. Moreover, debris flow usually carries more materials and travels a longer distance than landslide, making  
 247 it more harmful to the people and properties (Ietto et al., 2016). In fact, most of debris flow events are initialized from  
 248 landslide and cause more damages to the environment and society (Peng et al., 2015; Zhou et al., 2013).

249 Our results show that rainfall characteristics including rainfall amount, rainfall intensity, and rainfall duration all play  
 250 important roles in controlling the occurrence of landslide and debris flow. Relatively speaking, rainfall amount and rainfall  
 251 duration have higher impacts on the occurrence of landslide and debris flow than average rainfall intensity in this region.  
 252 This is because a rainstorm with higher average rainfall intensity does not necessary last for a long duration and lead to  
 253 larger accumulated rainfall amount. In addition, one has to note that the three rainfall characteristics do not necessary  
 254 correlate with each other. The previous studies have pointed out that different types of landslides and debris flows have  
 255 different critical rainfall conditions for failure considering the different geologic and geomorphologic conditions (Zezere et  
 256 al., 2015; Guzzetti et al., 2008). For example, rapid debris flows are typically triggered by very intense showers concentrated  
 257 in a few hours, while shallow translational soil slips are usually triggered by intense precipitation falling within a few days  
 258 (Zezere et al., 2015). In contrast, deep-seated landslides of rotational, translational and complex types are related to long  
 259 periods (weeks to months) of nearly constant rainfall (Zezere et al., 2015; Chen et al., 2013). In general, rainfall with long  
 260 duration and large rainfall amount is more likely to trigger landslide and debris flow (Saito et al., 2014).

261 Terrain slope is another important factor influencing the slope stability since gravity makes these slopes with higher slope  
 262 angles more vulnerable (Nourani et al., 2014; Dehnavi et al., 2015). In addition, terrains with steep slopes make plants harder  
 263 to establish and grow. Furthermore, the vegetation roots are hard to reach the sliding surface if the slope is steep (usually  
 264 exceed 1.5 m) (Ocakoglu et al., 2002; Cammeraat et al., 2005). In this case vegetation biomass may increase the weight of  
 265 landslide body and promote the occurrence of landslides (Nilaweera and Notalaya, 1999; Collison and Anderson, 1996). The  
 266 terrain and vegetation can interact with each other to create complex hydrological and mechanical effects on the slope stability.  
 267 Benefits from vegetation are conditional on the geological and geomorphological conditions (Nilaweera and Notalaya,  
 268 1999; Collison and Anderson, 1996).

269 Land cover type is another factor that impacts the slope stability. As show in our results (Fig. 10), cultivated lands have  
 270 higher landslide and debris flow occurrence rates than forests in the same climatic zone. The similar findings were also  
 271 reported in the previous researches, showing that conversion of natural vegetated lands, in particular forests, to cultivated  
 272 lands or the early-stage abandonment of cultivated lands can largely weaken slope stability by increasing surface water



runoff, intensifying erosion processes, and increasing soil instability (Begueria, 2006; Lopez-Saez et al., 2016; Persichillo et al., 2017). Besides, the slopes with woody vegetation are more stable than those with herbaceous vegetation because woody vegetation has deeper roots than herbaceous vegetation and can draw down soil moisture, making the slopes more stable (Kim et al., 2017; Begueria, 2006). In addition, some studies also show that the stand age, structure and composition of vegetation can influence the slope stability (Turner et al., 2010).

In this region, soil type does not appear to impose apparent, consistent effects on the occurrence rates of landslide and debris flow based on the available data. These results suggest that soil type is not the dominant factor influencing the slope stability in this region. As shown in the other studies, soil types and their physical properties such as cohesion, saturated hydraulic conductivity, porosity and friction angle have impacts on the slope failure and stability (Antinoro et al., 2017; van Asch and Malet, 2009; Zhang et al., 2016; Pasculli et al., 2017; Milne et al., 2012).

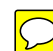

## 6. Conclusions

In this paper, we analyzed the spatiotemporal distributions, occurrence rates, and resultant casualties of rainfall-triggered landslide and debris flow based on a survey from 2009 to 2012 in Shaanxi Province, China. Our results show that landslide has a higher occurrence rate and more extensive distribution than debris flow in Shaanxi Province, while both of the two hazards are concentrated in the south of this region with ample rainfall and relatively steep terrains. Debris flow is more destructive than landslide in terms of the casualties per event. Both landslide and debris flow show a clear seasonality, corresponding to the rainy season in this region. Debris flow mainly occurs in July, whereas landslide usually takes place between July and September.

The characteristics of rainfall events including accumulated rainfall amount, duration and intensity and terrain slope show the strongest impacts on the slope stability and the occurrence rates of landslide and debris flow. The landslide and debris flow occurrences have exponential relationships with all of the above four factors ( $P < 0.1$ ). When accumulated rainfall amount and intensity are on the low and intermediate levels, landslide has a higher occurrence rate than debris flow. On the contrary, the debris flow occurrence rate is much higher than the landslide occurrence rate when accumulated rainfall amount and intensity are on the high level. Responses of the landslide and debris flow occurrence rates to rainfall duration do not differ much between each other. The occurrence of both landslide and debris flow also largely depends on the terrain slope, but landslide has a higher sensitivity to terrain slope than debris flow does. Our results also show that land cover also influences the occurrence of the two hazards to some extent in this region. In particular, both landslide and debris flow has lower occurrence rates on the natural vegetated land than on the cultivated lands. However, the study does not find an apparent relationship between the occurrence rates of the two hazards and soil type. In summary, we compiled an important inventory data of the rainfall-triggered landslide and debris flow hazards in Shaanxi Province, China based on a four-years



survey and revealed the spatiotemporal distributions and characteristics of these events and the impacts of rainfall characteristics, topography and soil texture on the occurrence of landslide and debris. This study not only provides an important inventory data for understanding the formation mechanisms and characteristics of the landslide and debris flow hazards but also add valuable information for modeling and predicting the rainfall-triggered landslide and debris flow hazards to improve preparedness for and enhance resilience to these hazards in this region and the other similar areas.

**Author contribution:** K.Z. designed the study; S.W. and K.Z. conducted this study; K.Z. and S.W. wrote this paper; H.B. and X.Z. provided the data and reviewed this paper.

**Competing interests:** The authors declare that they have no conflict of interest.

**Acknowledgments:** This study was supported by the National Key Research and Development Program of China (2016YFC0402701), National Natural Science Foundation of China (518679067, 51579131, 41875131), Fundamental Research Funds for the Central Universities of China (2015B28514, 2018B42914), Open Foundation of State Key Laboratory of Hydrology-Water Resources and Hydraulic Engineering (20165042212), and Priority Academic Program Development of Jiangsu Higher Education Institutions.

## References

- Althuwaynee, O. F., Pradhan, B., Park, H. J., and Lee, J. H.: A novel ensemble bivariate statistical evidential belief function with knowledge-based analytical hierarchy process and multivariate statistical logistic regression for landslide susceptibility mapping, *Catena*, 114, 21-36, 10.1016/j.catena.2013.10.011, 2014.
- Alvioli, M., and Baum, R. L.: Parallelization of the TRIGRS model for rainfall-induced landslides using the message passing interface, *Environmental Modelling & Software*, 81, 122-135, 2016.
- Antinoro, C., Arnone, E., and Noto, L. V.: The use of soil water retention curve models in analyzing slope stability in differently structured soils, *Catena*, 150, 133-145, 10.1016/j.catena.2016.11.019, 2017.
- Baum, R. L., Godt, J. W., and Savage, W. Z.: Estimating the timing and location of shallow rainfall-induced landslides using a model for transient, unsaturated infiltration, *J. Geophys. Res.*, 115, F03013, doi: 10.1029/2009jf001321, 2010.
- Begueria, S.: Changes in land cover and shallow landslide activity: A case study in the Spanish Pyrenees, *Geomorphology*, 74, 196-206, 10.1016/j.geomorph.2005.07.018, 2006.
- Blothe, J. H., Korup, O., and Schwanghart, W.: Large landslides lie low: Excess topography in the Himalaya-Karakoram ranges, *Geology*, 43, 523-526, 10.1130/g36527.1, 2015.
- Bogaard, T., and Greco, R.: Invited perspectives: Hydrological perspectives on precipitation intensity-duration thresholds for landslide initiation: proposing hydro-meteorological thresholds, *Nat Hazard Earth Sys*, 18, 31-39, 10.5194/nhess-18-31-2018, 2018.
- Borga, M., Stoffel, M., Marchi, L., Marra, F., and Jakob, M.: Hydrogeomorphic response to extreme rainfall in headwater systems: Flash floods and debris flows, *J. Hydrol.*, 518, 194-205, 10.1016/j.jhydrol.2014.05.022, 2014.
- Cammeraat, E., van Beek, R., and Kooijman, A.: Vegetation succession and its consequences for slope stability in SE Spain, *Plant and Soil*, 278, 135-147, 10.1007/s11104-005-5893-1, 2005.
- Chen, J., Chen, J., Liao, A. P., Cao, X., Chen, L. J., Chen, X. H., He, C. Y., Han, G., Peng, S., Lu, M., Zhang, W. W., Tong, X. H., and Mills, J.: Global land cover mapping at 30 m resolution: A POK-based operational approach, *Isprs Journal of Photogrammetry and Remote Sensing*, 103, 7-27, 2015a.
- Chen, J. J., Zeng, Z. G., Jiang, P., and Tang, H. M.: Deformation prediction of landslide based on functional network,

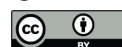

- 341 Neurocomputing, 149, 151-157, 10.1016/j.neucom.2013.10.044, 2015b.
- 342 Chen, W., Chai, H. C., Zhao, Z., Wang, Q. Q., and Hong, H. Y.: Landslide susceptibility mapping based on GIS and support
- 343 vector machine models for the Qianyang County, China, Environ Earth Sci, 75, ARTN 474
- 344 10.1007/s12665-015-5093-0, 2016.
- 345 Chen, W., Pourghasemi, H. R., and Zhao, Z.: A GIS-based comparative study of Dempster-Shafer, logistic regression and
- 346 artificial neural network models for landslide susceptibility mapping, Geocarto Int, 32, 367-385,
- 347 10.1080/10106049.2016.1140824, 2017.
- 348 Chen, Y. C., Chang, K. T., Chiu, Y. J., Lau, S. M., and Lee, H. Y.: Quantifying rainfall controls on catchment-scale landslide
- 349 erosion in Taiwan, Earth Surface Processes and Landforms, 38, 372-382, 2013.
- 350 Collison, A. J. C., and Anderson, M. G.: Using a combined slope hydrology stability model to identify suitable conditions
- 351 for landslide prevention by vegetation in the humid tropics, Earth Surface Processes and Landforms, 21, 737-747, Doi
- 352 10.1002/(Sici)1096-9837(199608)21:8<737::Aid-Esp674>3.0.Co;2-F, 1996.
- 353 Dehnavi, A., Aghdam, I. N., Pradhan, B., and Varzandeh, M. H. M.: A new hybrid model using step-wise weight assessment
- 354 ratio analysis (SWAM) technique and adaptive neuro-fuzzy inference system (ANFIS) for regional landslide hazard
- 355 assessment in Iran, Catena, 135, 122-148, 10.1016/j.catena.2015.07.020, 2015.
- 356 Gariano, S. L., Brunetti, M. T., Iovine, G., Melillo, M., Peruccacci, S., Terranova, O., Vennari, C., and Guzzetti, F.: Calibration and validation of rainfall thresholds for shallow landslide forecasting in Sicily, southern Italy, Geomorphology,
- 357 228, 653-665, 2015.
- 358 Guzzetti, F., Peruccacci, S., Rossi, M., and Stark, C. P.: Rainfall thresholds for the initiation of landslides in central and
- 359 southern Europe, Meteorology and Atmospheric Physics, 98, 239-267, 10.1007/s00703-007-0262-7, 2007.
- 360 Guzzetti, F., Peruccacci, S., Rossi, M., and Stark, C. P.: The rainfall intensity-duration control of shallow landslides and
- 361 debris flows: an update, Landslides, 5, 3-17, 10.1007/s10346-007-0112-1, 2008.
- 362 Han, Z., Li, Y. G., Huang, J. L., Chen, G. Q., Xu, L. R., Tang, C., Zhang, H., and Shang, Y. H.: Numerical simulation for
- 363 run-out extent of debris flows using an improved cellular automaton model, B Eng Geol Environ, 76, 961-974, 2017.
- 364 He, X. G., Hong, Y., Vergara, H., Zhang, K., Kirstetter, P. E., Gourley, J. J., Zhang, Y., Qiao, G., and Liu, C.: Development
- 365 of a coupled hydrological-geotechnical framework for rainfall-induced landslides prediction, J. Hydrol., 543, 395-405, 2016.
- 366 Hong, H. Y., Pradhan, B., Xu, C., and Tien Bui, D.: Spatial prediction of landslide hazard at the Yihuang area (China) using
- 367 two-class kernel logistic regression, alternating decision tree and support vector machines, Catena, 133, 266-281,
- 368 10.1016/j.catena.2015.05.019, 2015a.
- 369 Hong, H. Y., Chen, W., Xu, C., Youssef, A. M., Pradhan, B., and Bui, D. T.: Rainfall-induced landslide susceptibility
- 370 assessment at the Chongren area (China) using frequency ratio, certainty factor, and index of entropy, Geocarto Int, 32,
- 371 139-154, 10.1080/10106049.2015.1130086, 2017a.
- 372 Hong, H. Y., Liu, J. Z., Zhu, A. X., Shahabi, H., Pham, B. T., Chen, W., Pradhan, B., and Bui, D. T.: A novel hybrid
- 373 integration model using support vector machines and random subspace for weather-triggered landslide susceptibility
- 374 assessment in the Wuning area (China), Environ Earth Sci, 76, ARTN 652
- 375 10.1007/s12665-017-6981-2, 2017b.
- 376 Hong, Y., Adler, R., and Huffman, G.: Use of satellite remote sensing data in the mapping of global landslide susceptibility,
- 377 Nat Hazards, 43, 245-256, 2007.
- 378 Hong, Y., He, X. G., Cerato, A., Zhang, K., Hong, Z., and Liao, Z. H.: Predictability of a Physically Based Model for
- 379 Rainfall-induced Shallow Landslides: Model Development and Case Studies, Modern Technologies for Landslide
- 380 Monitoring and Prediction, 165-178, 10.1007/978-3-662-45931-7\_9, 2015b.
- 381 Huang, X. H., Li, Z. Y., Yu, D., Xu, Q., Fan, J. Y., Hao, Z., and Niu, Y. P.: Evolution of a giant debris flow in the
- 382 transitional mountainous region between the Tibetan Plateau and the Qinling Mountain range, Western China: Constraints
- 383 from broadband seismic records, J Asian Earth Sci, 148, 181-191, 10.1016/j.jseas.2017.08.031, 2017.
- 384 Huschke, R. E.: Glossary of Meteorology, American Meteorological Society, 69-86 pp., 2000.
- 385 Ietto, F., Perri, F., and Cella, F.: Geotechnical and landslide aspects in weathered granitoid rock masses (Serre Massif,
- 386 southern Calabria, Italy), Catena, 145, 301-315, 10.1016/j.catena.2016.06.027, 2016.
- 387

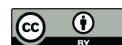

- 388 Jaboyedoff, M., Oppikofer, T., Abellan, A., Derron, M. H., Loye, A., Metzger, R., and Pedrazzini, A.: Use of LIDAR in  
389 landslide investigations: a review, *Nat Hazards*, 61, 5-28, 10.1007/s11069-010-9634-2, 2012.
- 390 Jiang, R. G., Xie, J. C., He, H. L., Luo, J. G., and Zhu, J. W.: Use of four drought indices for evaluating drought  
391 characteristics under climate change in Shaanxi, China: 1951-2012, *Nat Hazards*, 75, 2885-2903,  
392 10.1007/s11069-014-1468-x, 2015.
- 393 Kim, J. H., Fourcaud, T., Jourdan, C., Maeght, J. L., Mao, Z., Metayer, J., Meylan, L., Pierret, A., Rapidel, B., Rounsard, O.,  
394 de Rouw, A., Sanchez, M. V., Wang, Y., and Stokes, A.: Vegetation as a driver of temporal variations in slope stability: The  
395 impact of hydrological processes, *Geophys. Res. Lett.*, 44, 4897-4907, 10.1002/2017gl073174, 2017.
- 396 Liao, Z. H., Hong, Y., Kirschbaum, D., and Liu, C.: Assessment of shallow landslides from Hurricane Mitch in central  
397 America using a physically based model, *Environ Earth Sci*, 66, 1697-1705, 10.1007/s12665-011-0997-9, 2012.
- 398 Lopez-Saez, J., Corona, C., Eckert, N., Stoffel, M., Bourrier, F., and Berger, F.: Impacts of land-use and land-cover changes  
399 on rockfall propagation: Insights from the Grenoble conurbation, *Sci. Total Environ.*, 547, 345-355,  
400 10.1016/j.scitotenv.2015.12.148, 2016.
- 401 Milne, F. D., Brown, M. J., Knappett, J. A., and Davies, M. C. R.: Centrifuge modelling of hillslope debris flow initiation,  
402 *Catena*, 92, 162-171, 2012.
- 403 Montgomery, D. R., and Dietrich, W. E.: A physically based model for the topographic control on shallow landsliding,  
404 *Water Resour. Res.*, 30, 1153-1171, 1994.
- 405 Montrasio, L., and Valentino, R.: A model for triggering mechanisms of shallow landslides, *Nat Hazard Earth Sys*, 8,  
406 1149-1159, 2008.
- 407 Naef, D., Rickenmann, D., Rutschmann, P., and McArdell, B. W.: Comparison of flow resistance relations for debris flows  
408 using a one-dimensional finite element simulation model, *Nat Hazard Earth Sys*, 6, 155-165, 2006.
- 409 Nicolussi, K., Spotl, C., Thurner, A., and Reimer, P. J.: Precise radiocarbon dating of the giant Weis landslide (Eastern Alps,  
410 Austria), *Geomorphology*, 243, 87-91, 10.1016/j.geomorph.2016.05.001, 2015.
- 411 Nilaweera, N. S., and Nuthall, P.: Role of tree roots in slope stabilisation, *Bulletin of Engineering Geology & the*  
412 *Environment*, 57, 337-342, 1999.
- 413 Nourani, V., Pradhan, B., Ghaffari, H., and Sharifi, S. S.: Landslide susceptibility mapping at Zonouz Plain, Iran using  
414 genetic programming and comparison with frequency ratio, logistic regression, and artificial neural network models, *Nat*  
415 *Hazards*, 71, 523-547, 10.1007/s11069-013-0932-3, 2014.
- 416 Ocakoglu, F., Gokceoglu, C., and Ercanoglu, M.: Dynamics of a complex mass movement triggered by heavy rainfall: a case  
417 study from NW Turkey, *Geomorphology*, 42, 329-341, Doi 10.1016/S0169-555x(01)00094-0, 2002.
- 418 Pasculli, A., Sciarra, N., Esposito, L., and Esposito, A. W.: Effects of wetting and drying cycles on mechanical properties of  
419 pyroclastic soils, *Catena*, 156, 113-123, 10.1016/j.catena.2017.04.004, 2017.
- 420 Peng, J. B., Fan, Z. J., Wu, D., Zhuang, J. Q., Dai, F. C., Chen, W. W., and Zhao, C.: Heavy rainfall triggered  
421 loess-mudstone landslide and subsequent debris flow in Tianshui, China, *Eng Geol*, 186, 79-90, 2015.
- 422 Persichillo, M. G., Bordoni, M., and Meisina, C.: The role of land use changes in the distribution of shallow landslides, *Sci.*  
423 *Total Environ.*, 574, 924-937, 10.1016/j.scitotenv.2016.09.125, 2017.
- 424 Peruccacci, S., Brunetti, M. T., Luciani, S., Vennari, C., and Guzzetti, F.: Lithological and seasonal control on rainfall  
425 thresholds for the possible initiation of landslides in central Italy, *Geomorphology*, 139, 79-90,  
426 10.1016/j.geomorph.2011.10.005, 2012.
- 427 Petley, D. N.: On the impact of climate change and population growth on the occurrence of fatal landslides in South, East  
428 and SE Asia, *Q J Eng Geol Hydrogeol*, 43, 487-496, 10.1144/1470-9236/09-001, 2010.
- 429 Pradhan, B., and Youssef, A. M.: Manifestation of remote sensing data and GIS on landslide hazard analysis using  
430 spatial-based statistical models, *Arab J Geosci*, 3, 319-326, 10.1007/s12517-009-0089-2, 2010.
- 431 Qin, S. Q., Jiao, J. J., and Wang, S. J.: The predictable time scale of landslides, *Bulletin of Engineering Geology & the*  
432 *Environment*, 59, 307-312, 2001.
- 433 Saito, H., Korup, O., Uchida, T., Hayashi, S., and Oguchi, T.: Rainfall conditions, typhoon frequency, and contemporary  
434 landslide erosion in Japan, *Geology*, 42, 999-1002, 2014.



- 435 Sorbino, G., Sica, C., and Cascini, L.: Susceptibility analysis of shallow landslides source areas using physically based  
436 models, *Nat Hazards*, 53, 313-332, 10.1007/s11069-009-9431-y, 2010.
- 437 Sun, P., Peng, J. B., Chen, L. W., Lu, Q. Z., and Igwe, O.: An experimental study of the mechanical characteristics of  
438 fractured loess in western China, *B Eng Geol Environ*, 75, 1639-1647, 10.1007/s10064-015-0793-y, 2016.
- 439 Turner, T. R., Duke, S. D., Fransen, B. R., Reiter, M. L., Kroll, A. J., Ward, J. W., Bach, J. L., Justice, T. E., and Bilby, R. E.:  
440 Landslide densities associated with rainfall, stand age, and topography on forested landscapes, southwestern Washington,  
441 USA, *For. Ecol. Manage.*, 259, 2233-2247, 2010.
- 442 van Asch, T. W. J., and Malet, J. P.: Flow-type failures in fine-grained soils: an important aspect in landslide hazard analysis,  
443 *Nat Hazard Earth Sys*, 9, 1703-1711, 10.5194/nhess-9-1703-2009, 2009.
- 444 Wooten, R. M., Gillon, K. A., Witt, A. C., Latham, R. S., Douglas, T. J., Bauer, J. B., Fuemmeler, S. J., and Lee, L. G.:  
445 Geologic, geomorphic, and meteorological aspects of debris flows triggered by Hurricanes Frances and Ivan during  
446 September 2004 in the Southern Appalachian Mountains of Macon County, North Carolina (southeastern USA), *Landslides*,  
447 5, 31-44, 2008.
- 448 Wu, H., and Qian, H.: Innovative trend analysis of annual and seasonal rainfall and extreme values in Shaanxi, China, since  
449 the 1950s, *International Journal of Climatology*, 37, 2582-2592, 10.1002/joc.4866, 2017.
- 450 Zezere, J. L., Vaz, T., Pereira, S., Oliveira, S. C., Marques, R., and Garcia, R. A. C.: Rainfall thresholds for landslide activity  
451 in Portugal: a state of the art, *Environ Earth Sci*, 73, 2917-2936, 2015.
- 452 Zhang, K., Xue, X. W., Hong, Y., Gourley, J. J., Lu, N., Wan, Z. M., Hong, Z., and Wooten, R.: iCRESTRIGRS: a coupled  
453 modeling system for cascading flood-landslide disaster forecasting, *Hydrol. Earth Syst. Sci.*, 20, 5035-5048, 2016.
- 454 Zhang, P., Ma, J. Z., Shu, H. P., Han, T., and Zhang, Y. L.: Simulating debris flow deposition using a two-dimensional finite  
455 model and Soil Conservation Service-curve number approach for Hanlin gully of southern Gansu (China), *Environ Earth Sci*,  
456 73, 6417-6426, 2015.
- 457 Zhang, Y. C., Zhang, F., Zhang, J. Q., Guo, E. L., Liu, X. P., and Tong, Z. J.: Research on the Geological Disaster Forecast  
458 and Early Warning Model Based on the Optimal Combination Weighing Law and Extension Method: a Case Study in China,  
459 *Pol J Environ Stud*, 26, 2385-2395, 10.15244/pjoes/69100, 2017.
- 460 Zhou, J. W., Cui, P., Yang, X. G., Su, Z. M., and Guo, X. J.: Debris flows introduced in landslide deposits under rainfall  
461 conditions: The case of Wenjiagou gully, *J Mt Sci-Engl*, 10, 249-260, 2013.
- 462 Zhu, X., Xu, Q., Tang, M. G., Nie, W., Ma, S. Q., and Xu, Z. P.: Comparison of two optimized machine learning models for  
463 predicting displacement of rainfall-induced landslide: A case study in Sichuan Province, China, *Eng Geol*, 218, 213-222,  
464 10.1016/j.enggeo.2017.01.022, 2017.
- 465 Zhuang, J. Q., and Peng, J. B.: A coupled slope cutting-a prolonged rainfall-induced loess landslide: a 17 October 2011 case  
466 study, *B Eng Geol Environ*, 73, 997-1011, 2014.

467



468 **Figure Captions:**

469 **Figure 1: Spatial maps of (a) elevation, (b) land cover and (c) soil type across the study region.**

470 **Figure 2: Locations of reported rainfall-triggered landslide and debris flow events and the resultant casualties in Shaanxi Province**  
 471 **from 2009 to 2012; the inset shows the location of Shaanxi Province in China.**

472 **Figure 3: (a) Interannual distributions of reported landslide and debris flow events and the associated casualties from 2009 to**  
 473 **2012, and (b) pie charts of the disaster types and their corresponding casualties.**

474 **Figure 4: (a) Yearly distributions and (b) monthly distributions of rainfall amount, the number of landslide events, and the**  
 475 **number of debris flow events from 2009 to 2012, and (c) the distribution of multi-year mean monthly rainfall intensity.**

476 **Figure 5: Distributions of annual rainfall amount, landslide events, and debris flow events along the latitude bands, and spatial**  
 477 **average slopes and percentages of dominant land cover types in these latitude bands.**

478 **Figure 6: Relationship of occurrence rates of landslide and debris flow events with the corresponding (a) accumulated amount of**  
 479 **antecedent continuous rainfall, (b) rainfall duration, and (c) average rainfall intensity.**

480 **Figure 7: Regional average occurrence rates of landslide and debris flow events under different rainfall intensity classes.**

481 **Figure 8: Spatial distributions of the occurrence rates of (a-d) landslide and (e-h) debris flow under four rainfall intensity classes:**  
 482 **light rain, moderate rain, heavy rain, and violent rain; only these grid cells with recorded landslide or debris flow events were**  
 483 **analyzed and plotted in this figure.**

484 **Figure 9: Occurrence rates of landslide and debris flow under different degrees of terrain slopes.**

485 **Figure 10: Occurrence rates of landslide and debris flow under different (a) land cover types and (b) soil types.**

486





Figure 1: Spatial maps of (a) elevation, (b) land cover and (c) soil type across the study region.

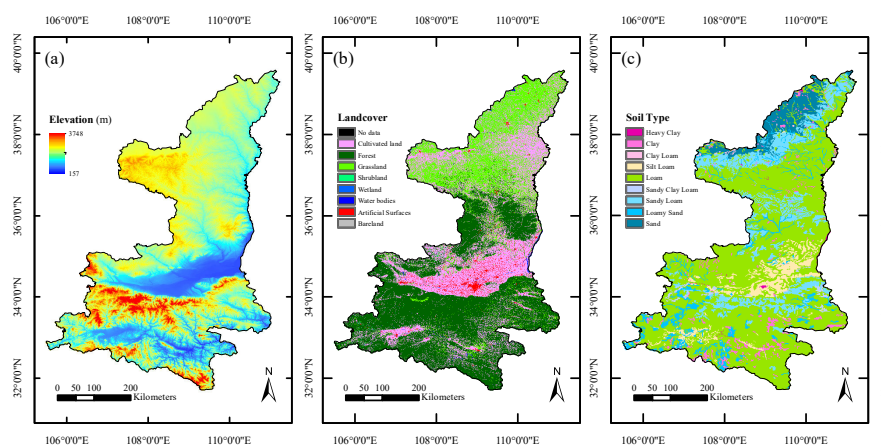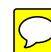





490 **Figure 2: Locations of reported rainfall-triggered landslide and debris flow events and the resultant casualties in Shaanxi Province**  
 491 **from 2009 to 2012; the inset shows the location of Shaanxi Province in China.**

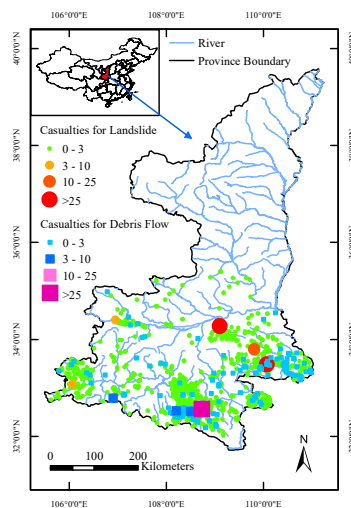



Figure 3: (a) Interannual distributions of reported landslide and debris flow events and the associated casualties from 2009 to 2012, and (b) pie charts of the disaster types and their corresponding casualties.

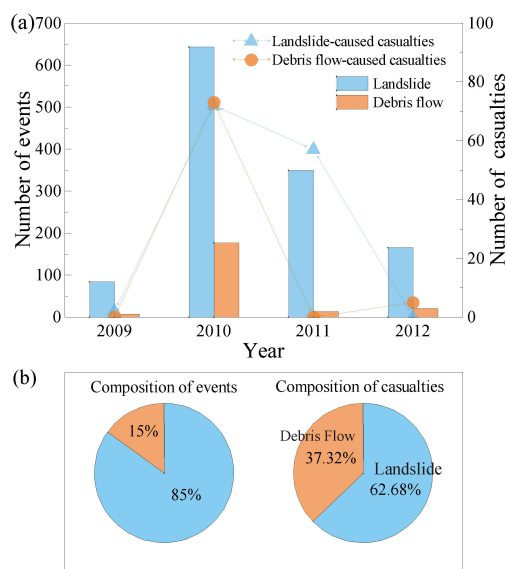



Figure 4: (a) Yearly distributions and (b) monthly distributions of rainfall amount, the number of landslide events, and the number of debris flow events from 2009 to 2012, and (c) the distribution of multi-year mean monthly rainfall intensity.

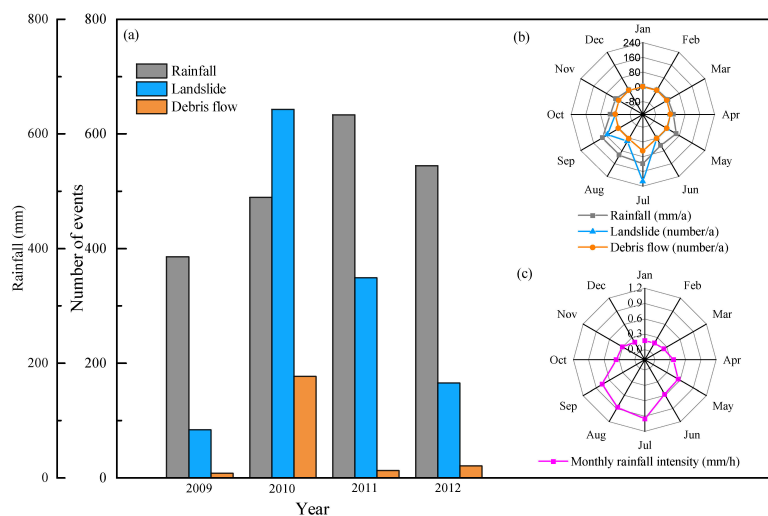



Figure 5: Distributions of annual rainfall amount, landslide events, and debris flow events along the latitude bands, and spatial average slopes and percentages of dominant land cover types in these latitude bands.

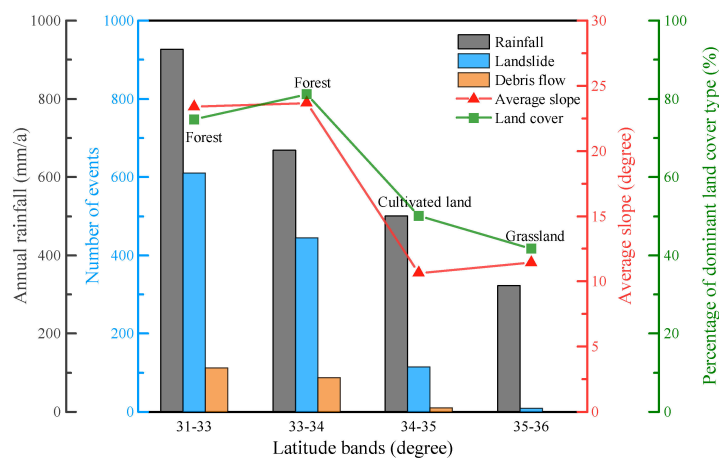



Figure 6: Relationship of occurrence rates of landslide and debris flow events with the corresponding (a) accumulated amount of antecedent continuous rainfall, (b) rainfall duration, and (c) average rainfall intensity.

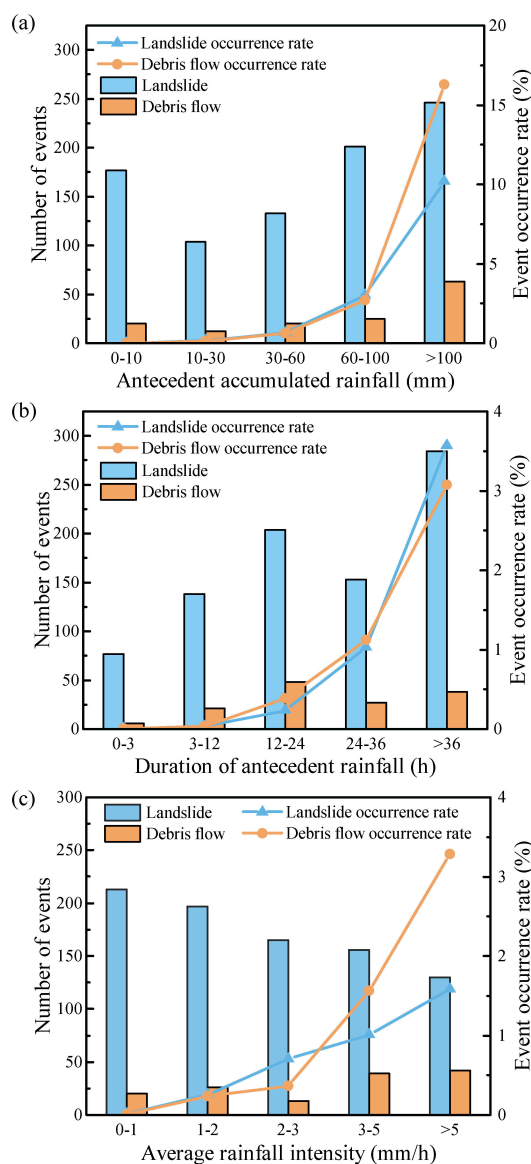



Figure 7: Regional average occurrence rates of landslide and debris flow events under different rainfall intensity classes.

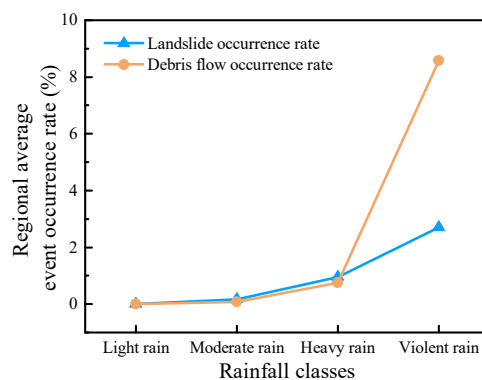



Figure 8: Spatial distributions of the occurrence rates of (a-d) landslide and (e-h) debris flow under four rainfall intensity classes: light rain, moderate rain, heavy rain, and violent rain; only these grid cells with recorded landslide or debris flow events were analyzed and plotted in this figure.

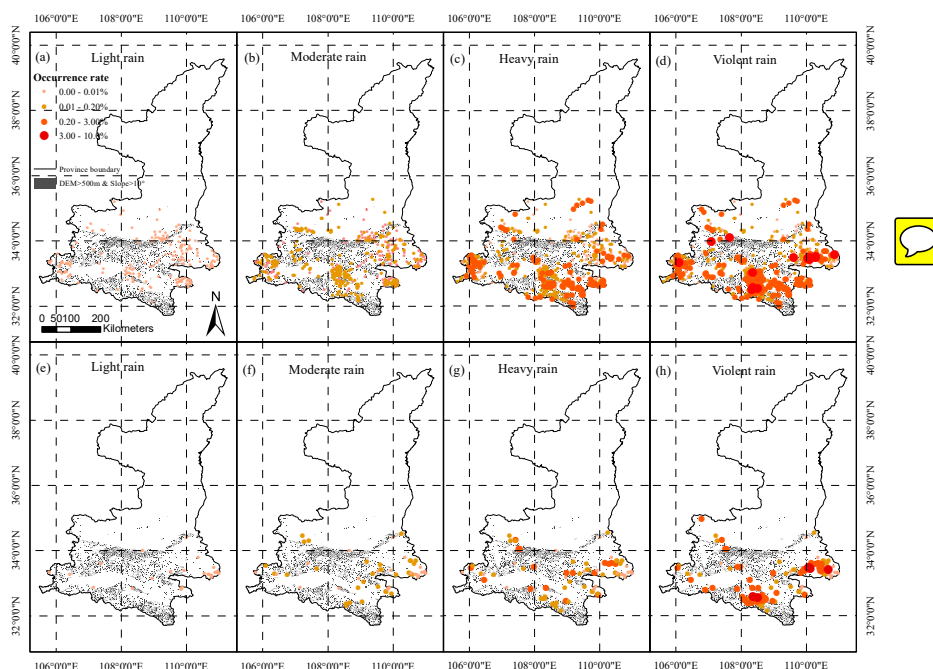



519 **Figure 9: Occurrence rates of landslide and debris flow under different degrees of terrain slopes.**

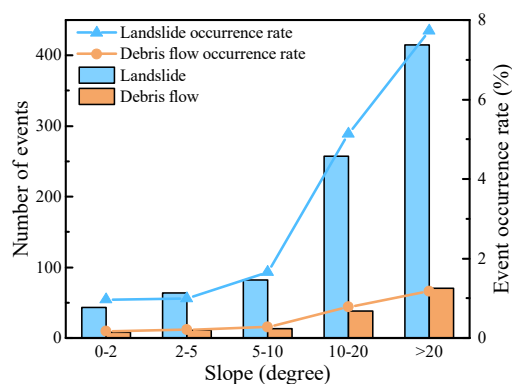

520





Figure 10: Occurrence rates of landslide and debris flow under different (a) land cover types and (b) soil types.

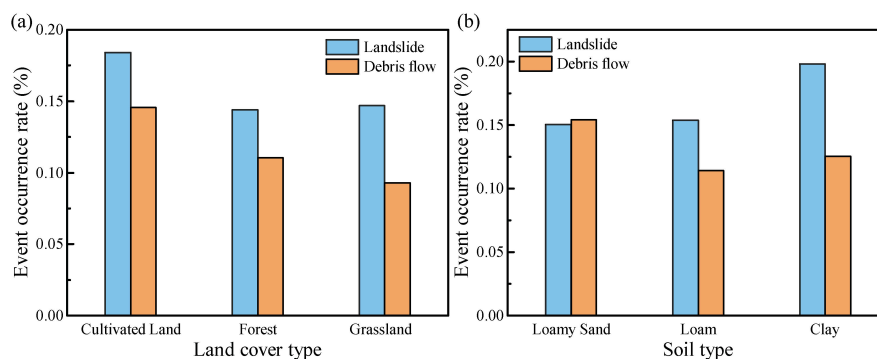

Supplement: Supplementary file [file nhess-2018-262-RC1-supplement.pdf]
